# Supplementary material
Source: HighWire-hosted journal article supplement (https://www.rcpjournals.org/highwire/filestream/13803/field_highwire_adjunct_files/0/Colwill_Supplementary_material_S1.pdf)
Supplement: Colwill_Supplementary_material_S1.pdf [file Colwill_Supplementary_material_S1.pdf]

Supplementary material S1: Pro forma for data collection.

| Patient ID | Date of OGD | Result of OGD | Subsequent Variceal Bleed? | Date of most recent follow up OGD | Previous Varices? | Most recent Platelet count (within 12 months) | Most Recent Fibroscan Result (within 12 months of OGD) | Decompensation at time of OGD? | Date of Last Surveillance | Result of Last Surveillance OGD | When is next follow-up OGD planned? |
|------------|-------------|---------------|----------------------------|-----------------------------------|-------------------|-----------------------------------------------|--------------------------------------------------------|--------------------------------|---------------------------|---------------------------------|-------------------------------------|
|            |             |               |                            |                                   |                   |                                               |                                                        |                                |                           |                                 |                                     |
|            |             |               |                            |                                   |                   |                                               |                                                        |                                |                           |                                 |                                     |
|            |             |               |                            |                                   |                   |                                               |                                                        |                                |                           |                                 |                                     |
|            |             |               |                            |                                   |                   |                                               |                                                        |                                |                           |                                 |                                     |
|            |             |               |                            |                                   |                   |                                               |                                                        |                                |                           |                                 |                                     |
|            |             |               |                            |                                   |                   |                                               |                                                        |                                |                           |                                 |                                     |
|            |             |               |                            |                                   |                   |                                               |                                                        |                                |                           |                                 |                                     |
|            |             |               |                            |                                   |                   |                                               |                                                        |                                |                           |                                 |                                     |
|            |             |               |                            |                                   |                   |                                               |                                                        |                                |                           |                                 |                                     |
|            |             |               |                            |                                   |                   |                                               |                                                        |                                |                           |                                 |                                     |
|            |             |               |                            |                                   |                   |                                               |                                                        |                                |                           |                                 |                                     |

OGD = oesophagogastroduodenoscopy
